# Supplementary material for: Analysis of local and systemic side effects of bacillus Calmette-Guérin immunotherapy in bladder cancer: a retrospective study in Türkiye
Source: PeerJ. 2025 Feb 12;13:e18870. doi: 10.7717/peerj.18870 (PMC11829628; doi:10.7717/peerj.18870)
Supplement: Supplemental Information 1 [file peerj-13-18870-s001.xlsx]

## Sheet: Sayfa1
PROTOKOL	Hasta No	ADI	SOYADI	DOGUM	CİNSİYET	YAŞ	KRONİK HASTALIK VARLIĞI	DM	HT	BPH	AST	ALT	KR	hmg	wbc	Herhangi bir komplikasyon	Minor komplikasyon (ateş, sistit, hematüri, dizüri)	ateş	sistit	hematüri	dizüri	Major komplikasyon (sepsis, septik sok,artrit, pnomoni,LAP, HEPATİT)	sepsis	septik şok	artrit	pnömoni	LAP	HEPATİT	kaç doz BCG	KAÇINCIDA SEMPTOM	YIL	idrar kültürü	e.coli	e.fecalis	TEDAVİ SONLANDIRMA NEDENİ
PROTOKOL	Hasta No	ADI	SOYADI	DOGUM	CİNSİYET	YAŞ	KRONİK HASTALIK VARLIĞI	DM	HT	BPH	ast	alt	KR	hmg	wbc	Herhangi bir komplikasyon	Minor komplikasyon (ateş, sistit, hematüri, dizüri)	ateş	sistit	hematüri	dizüri	Major komplikasyon (sepsis, septik sok,artrit, pnomoni,LAP, HEPATİT)	sepsis	septik şok	artrit	pnömoni	LAP	HEPATİT	kaç doz BCG	Kaçıncıda semptom	YIL	idrar kültürü	e.coli	e.fecalis	TEDAVİ SONLANDIRMA NEDENİ
39344621	211616	MUSTAFA	GENÇ	1947-06-01	E	77	1	0	1	0	373	246	2.2	13.6	10000	1	1	1	1	0	1	1	1	1	0	0	0	1	1	1	2022	K. pneumoniae	0	0	tbc sepsisi
37299934	310661	KEMAL	KAHYALAR	1969-01-11	E	55	1	1	1	1	26	46	0.5	12.5	6300	1	1	1	1	3	1	1	1	0	0	0	0	0	3	3	2022	E. COLİ	1	0	sepsis
33078639	4008480	AHMET	KATIRCI	1948-04-10	E	76	1	1	0	0	26	46	0.6	8.9	6500	1	1	1	1	3	1	1	1	0	0	0	0	0	3	3	2022	E. COLİ	1	0	sepsis
41448092	3192205	MUTTALİP	HARMAN	1952-01-12	E	72	1	0	1	1	29	20	1	11	12000	1	1	1	0	0	1	1	1	0	0	0	0	0	4	4	2020	E.faecium	0	1	sepsis
39618878	4524144	MEHMET	VERAL	1955-02-01	E	69	1	1	0	1	333	622	1.5	7.3	23100	1	1	1	1	2	1	1	1	0	0	0	1	1	4	4	2023	0	0	0	sepsis
38462540	3607230	ABİDİN	TAŞKIN	1964-10-10	E	59	1	1	1	0	289	388	1.5	7.3	3100	1	1	1	1	2	1	1	1	0	0	0	1	1	4	4	2022	0	0	0	sepsis
39121326	3137756	SALAHATTİN	USLU	1949-05-01	E	75	1	1	0	1	21	16	0.1	13.8	9600	1	1	1	1	2	1	1	1	0	0	0	0	0	5	5	2022	0	0	0	sepsis
34722743	217861	ALİ	KARACA	1949-10-26	E	74	0	0	0	0	25	20	1.7	14	14000	1	1	0	0	1	1	1	0	0	0	0	1	0	6	5	2020	0	0	0	0
35780265	3615097	BAYRAM	DİNDAR	1950-09-23	E	73	1	0	1	1	45	41	1.8	13.8	16700	1	1	1	1	3	1	0	0	0	0	0	0	0	6	0	2021	0	0	0	0
35832727	1266545	İSMAİL	SUNAY	1951-10-10	E	72	1	0	1	1	42	29	0.4	13.1	13500	1	1	0	0	3	0	0	0	0	0	0	0	0	6	0	2021	0	0	0	0
35983746	266020	HALİL	YILDIRIMER	1949-05-03	E	75	1	0	1	1	42	43	0.6	12.8	6600	1	1	0	0	1	0	0	0	0	0	0	0	0	6	0	2021	0	0	0	0
36688834	103110	ADEM	ÖZDEMİR	1972-01-02	E	52	1	0	1	1	13	20	0.6	12.1	6900	0	0	0	0	0	0	0	0	0	0	0	0	0	6	0	2022	0	0	0	0
37498583	315312	SEBAHATTİN	ÖZDEMİREL	1957-10-07	E	66	1	0	1	1	26	36	1.4	13.6	9500	1	1	0	0	2	0	0	0	0	0	0	0	0	6	0	2022	0	0	0	0
37852393	377683	SABRİ	ULUM	1948-01-01	E	76	1	0	1	1	30	25	0.9	13.1	6500	0	0	0	0	0	0	0	0	0	0	0	0	0	6	0	2022	0	0	0	0
39206530	324784	HALİL	YAZICI	1946-02-01	E	78	1	0	1	1	45	20	1.3	9	4100	1	1	0	0	2	0	0	0	0	0	0	0	0	6	0	2020	0	0	0	0
35165836	3513962	GÜRCÜ	ÖZTÜRK	1962-08-09	E	62	1	0	1	1	33	66	0.6	15.1	6800	0	0	0	0	0	0	0	0	0	0	0	0	0	6	0	2021	0	0	0	0
33060680	3567544	NAMİ	ÖNAL	1945-04-05	E	79	1	0	1	1	24	17	1.1	15	12700	1	1	0	0	3	0	0	0	0	0	0	0	0	6	0	2021	0	0	0	0
34372912	4105063	MEHMET	GÜNEŞ	1964-12-01	E	59	1	0	1	1	47	22	0.6	10	5200	1	1	0	0	2	0	0	0	0	0	0	0	0	6	0	2023	0	0	0	0
41320541	69235	MEHMET	KOLCU	1950-05-08	E	74	1	0	1	1	44	28	1.6	13	16400	0	0	0	0	0	0	0	0	0	0	0	0	0	6	0	2023	0	0	0	0
41336186	537763	HAKAN	AYDEMİR	1980-04-03	E	44	1	1	0	1	21	24	0.9	12.8	6800	0	0	0	0	0	0	0	0	0	0	0	0	0	6	0	2023	E. COLİ	1	0	0
35612705	200880	ÖMER	ERSUN	1945-04-15	E	79	1	0	0	1	17	23	0.6	12.2	12700	1	1	0	0	3	0	0	0	0	0	0	0	0	6	0	2021	0	0	0	0
35614084	197103	ORHAN	ABALI	1952-01-27	E	72	1	0	0	1	35	8	1	12.9	16700	1	1	0	0	1	0	0	0	0	0	0	0	0	6	0	2021	0	0	0	0
35816355	4011421	YAHYA	SEKER	1954-08-23	E	70	1	0	0	1	21	9	1.6	11.7	17700	1	1	0	0	2	0	0	0	0	0	0	0	0	6	0	2021	0	0	0	0
35915464	4090618	YALÇIN	DEMİRCİOĞLU	1967-04-23	E	57	1	0	0	1	9	10	1.3	12.4	15200	1	1	0	0	2	0	0	0	0	0	0	0	0	6	0	2021	0	0	0	0
37066047	4371286	ALİ	ERTÜRK	1972-04-23	E	52	1	0	0	1	24	40	1.1	11.9	9900	1	1	0	0	2	0	0	0	0	0	0	0	0	6	0	2022	0	0	0	0
37088612	4130903	CEMALETTİN	İNEL	1950-01-20	E	74	1	0	0	1	33	21	1.1	13.4	13200	1	1	0	0	1	0	0	0	0	0	0	0	0	6	0	2022	0	0	0	0
37382036	4387373	MUSTAFA KEMAL	TÜMER	1950-09-16	E	73	1	0	0	1	45	38	1.5	13	4800	0	0	0	0	0	0	0	0	0	0	0	0	0	6	0	2022	0	0	0	0
38077653	3070490	ŞABİ	BERİŞ	1958-11-01	E	65	1	0	0	1	10	26	0.4	11.9	13400	1	1	0	0	3	0	0	0	0	0	0	0	0	6	0	2022	0	0	0	0
38277844	1486270	OSMAN	DOĞAN	1952-04-28	E	72	1	0	0	1	33	14	0.9	11.8	17700	1	1	1	0	3	0	0	0	0	0	0	0	0	6	0	2022	S.AGALACTIAE	0	0	0
38427550	80964	MEHMET	YÜZGÜL	1947-01-22	E	77	1	0	0	1	24	9	0.6	10	9700	1	1	0	0	2	0	0	0	0	0	0	0	0	6	0	2022	M. MORGANII	0	0	0
38430719	931181	TİMUR	ERERİŞKEN	1957-05-25	E	67	1	0	0	1	25	37	0.9	9.8	18000	0	0	0	0	0	0	0	0	0	0	0	0	0	6	0	2022	0	0	0	0
38614550	924490	METİN	SEVER	1966-07-01	E	58	1	0	0	1	19	19	0.9	13	4700	0	0	0	0	0	0	0	0	0	0	0	0	0	6	0	2022	0	0	0	0
38942198	4503466	MEHMET	ÖZDOĞAN	1969-04-09	E	55	1	0	0	1	15	17	1.2	13.9	8000	0	0	0	0	0	0	0	0	0	0	0	0	0	6	0	2022	0	0	0	0
33242638	1295812	MEHMET	SÜNGER	1941-12-13	E	83	1	0	0	1	39	29	1	12.8	7900	1	1	0	1	0	0	0	0	0	0	0	0	0	6	0	2018	0	0	0	0
40030540	1560214	DURMUŞ ALİ	ÇETİNKAYA	1971-09-18	E	53	1	0	0	1	13	12	0.99	16	7700	1	1	0	1	0	0	0	0	0	0	0	0	0	6	0	2018	0	0	0	0
33477573	201798	İDRİS	KURAL	1941-05-27	E	82	1	0	0	1	15	8	1	11	4700	0	0	0	0	0	0	0	0	0	0	0	0	0	6	0	2018	0	0	0	0
34047097	36301	NAİL	ELBİRLİK	1958-05-27	E	66	1	0	0	1	42	25	0.8	13.2	4700	0	0	0	0	0	0	0	0	0	0	0	0	0	6	0	2021	0	0	0	0
34539014	3919401	ARİF	BAYHAN	1957-03-20	E	67	1	0	0	1	28	14	0.8	12	12800	0	0	0	0	0	0	0	0	0	0	0	0	0	6	0	2022	0	0	0	0
39539753	469299	MEHMET	İNCESU	1953-03-11	E	71	1	0	0	1	21	10	1.6	13	7530	0	0	0	0	0	0	0	0	0	0	0	0	0	6	0	2023	0	0	0	0
34717140	57864	AHMET	PINAR	1947-10-17	E	76	1	0	0	1	21	44	0.6	10.9	10000	0	0	0	0	0	0	0	0	0	0	0	0	0	6	0	2023	0	0	0	0
40876403	81107	CEMİL	BARDAKCIOĞLU	1950-09-22	E	73	1	0	0	1	22	18	0.7	11.8	6700	0	0	0	0	0	0	0	0	0	0	0	0	0	6	0	2023	0	0	0	0
38126231	601927	HAKAN	DİNÇ	1978-01-14	E	46	1	1	1	0	44	21	0.3	11.5	4200	1	1	0	0	2	0	0	0	0	0	0	0	0	6	0	2022	0	0	0	0
38803801	4466906	EŞREF	ÖZDAMAR	1958-01-01	E	66	1	1	1	0	12	14	2.1	12.5	14000	1	1	1	1	1	1	0	0	0	0	0	0	0	6	0	2022	E. FECALİS	0	1	0
33510478	3749857	CAFER	KESKİN	1953-01-08	E	71	1	1	1	0	22	18	2.1	13.4	11500	1	1	1	1	1	1	0	0	0	0	0	0	0	6	0	2021	E. COLi	1	0	0
35533250	4207660	HALİL	SERİN	1963-02-19	E	61	1	0	1	0	37	33	0.5	13.7	8600	1	1	0	0	1	0	0	0	0	0	0	0	0	6	0	2021	0	0	0	0
35629482	1303422	MEHMET	ÇİFTÇİ	1973-05-03	E	51	1	0	1	0	17	20	0.2	11.7	9200	1	1	0	0	2	0	0	0	0	0	0	0	0	6	0	2021	0	0	0	0
35824728	262781	MUSTAFA	DÖRDÜNCÜ	1941-04-03	E	83	1	0	1	0	10	25	1.5	12.6	9900	0	0	0	0	0	0	0	0	0	0	0	0	0	6	0	2021	0	0	0	0
36025827	154789	İBRAHİM	KIRMAÇ	1951-12-11	E	72	1	0	1	0	34	21	1.4	13.8	5200	0	0	0	0	0	0	0	0	0	0	0	0	0	6	0	2021	0	0	0	0
36173672	4277528	MEHMET	EROĞLU	1959-05-01	E	65	1	0	1	0	44	16	1.9	11.4	5600	1	1	1	0	1	0	0	0	0	0	0	0	0	6	0	2022	0	0	0	0
37749557	103353	RAMAZAN	TÜRKSEVEN	1956-07-01	E	68	1	0	1	0	25	31	1.4	12.6	11600	1	1	1	1	1	1	0	0	0	0	0	0	0	6	0	2022	0	0	0	0
37795718	3530131	İLYAS	TEMEL	1956-01-01	E	68	1	0	1	0	23	12	1.5	11.3	7600	0	0	0	0	0	0	0	0	0	0	0	0	0	6	0	2022	0	0	0	0
38016155	1406632	KIYASETTİN	SARI	1963-05-26	E	61	1	0	1	0	20	45	1.5	11.5	13200	0	0	0	0	0	0	0	0	0	0	0	0	0	6	0	2022	0	0	0	0
33370177	1533122	NİHAT	ÇANKAYA	1945-01-09	E	79	1	0	1	0	19	11	1	10.3	8400	1	1	0	1	0	0	0	0	0	0	0	0	0	6	0	2018	E.faecalis	0	1	ex
39081989	1657993	HASAN HÜSEYİN	GÖKÇEK	1960-04-01	E	64	1	0	1	0	18	19	0.9	13.9	12200	1	1	1	0	0	0	0	0	0	0	0	0	0	6	0	2018	0	0	0	0
41633353	3435096	ÜMİT	YAZAN	1957-05-21	E	67	1	0	1	0	21	22	1.5	8.8	4700	0	0	0	0	0	0	0	0	0	0	0	0	0	6	0	2021	0	0	0	0
39594677	3571502	ZAHİT	BAKIR	1940-08-29	E	84	1	0	1	0	28	16	1	16	15300	1	1	1	0	1	0	0	0	0	0	0	0	0	6	0	2021	0	0	0	0
41138691	4603423	AHMET	ALTUN	1945-03-02	E	79	1	0	1	0	22	12	0.8	13	7200	0	0	0	0	0	0	0	0	0	0	0	0	0	6	0	2023	0	0	0	0
33436034	824130	YAŞAR	DİRİCANOĞLU	1947-12-30	E	76	1	0	1	0	25	18	1	12.9	15300	1	1	0	0	1	0	0	0	0	0	0	0	0	6	0	2023	0	0	0	0
35540040	847384	ADNAN	KIRAN	1954-05-02	E	70	0	0	0	0	45	15	1.7	12.8	17600	1	1	0	0	1	0	0	0	0	0	0	0	0	6	0	2021	0	0	0	0
35545138	1101668	ALİ	TAN	1960-01-01	E	64	0	0	0	0	8	26	1.9	12	4300	1	1	0	0	1	0	0	0	0	0	0	0	0	6	0	2021	0	0	0	0
35550481	3982225	MEHMET ARİF	DALKIRAN	1942-03-01	E	82	0	0	0	0	9	35	1.7	11.1	11600	1	1	0	0	3	0	0	0	0	0	0	0	0	6	0	2021	0	0	0	0
35665589	4180954	NİYAZİ	AYKUT	1954-01-10	E	70	0	0	0	0	14	40	1.1	11.6	13900	0	0	0	0	0	0	0	0	0	0	0	0	0	6	0	2021	0	0	0	0
35673471	3904936	NAZIM	BEKA	1951-07-01	E	73	0	0	0	0	22	33	1.7	12.3	6200	1	1	0	0	1	0	0	0	0	0	0	0	0	6	0	2021	0	0	0	0
35792861	304797	MUSA	COŞKUN	1950-07-23	E	74	0	0	0	0	21	32	1.1	11.2	12300	1	1	0	0	3	0	0	0	0	0	0	0	0	6	0	2021	0	0	0	0
35826006	128852	OSMAN	ŞENGÜL	1941-07-01	E	83	0	0	0	0	17	32	1.7	13.6	6600	0	0	0	0	0	0	0	0	0	0	0	0	0	6	0	2021	0	0	0	0
35845424	2844633	MESUT	UÇAR	1941-04-21	E	83	0	0	0	0	23	8	1.4	13.1	4300	1	1	0	0	2	0	0	0	0	0	0	0	0	6	0	2021	0	0	0	0
35869800	4266885	MUAMMER	ŞIK	1959-05-28	E	65	0	0	0	0	35	23	2	12.4	11300	0	0	0	0	0	0	0	0	0	0	0	0	0	6	0	2021	0	0	0	0
35919784	1667919	KEMAL	YILMAZ	1944-10-10	E	79	0	0	0	0	32	17	1.7	12.5	10200	1	1	0	0	1	0	0	0	0	0	0	0	0	6	0	2021	0	0	0	0
36061405	3668303	HÜSEYİN	AKTAŞ	1956-01-11	E	68	0	0	0	0	31	17	0.5	11.1	7500	1	1	0	0	1	0	0	0	0	0	0	0	0	6	0	2021	0	0	0	0
36083126	4133358	HALİL	DURGUT	1966-08-25	E	58	0	0	0	0	36	20	1.7	12.3	10700	0	0	0	0	0	0	0	0	0	0	0	0	0	6	0	2021	0	0	0	0
36189740	1492799	MÜNİR	DENİZ	1966-12-16	E	57	0	0	0	0	15	12	1.5	12.1	9700	1	1	0	0	1	0	0	0	0	0	0	0	0	6	0	2022	0	0	0	0
36305064	964991	SELİM	AKBAŞ	1968-06-05	E	56	0	0	0	0	42	22	1.7	12.7	17000	1	1	1	0	0	0	0	0	0	0	0	0	0	6	0	2022	0	0	0	0
36379564	1408748	PEHLÜL	COŞAN	1939-01-01	E	85	0	0	0	0	45	35	1.2	12.8	14400	0	0	0	0	0	0	0	0	0	0	0	0	0	6	0	2022	0	0	0	0
36745249	3526254	İSMET	KORKMAZ	1943-09-02	E	80	0	0	0	0	7	12	0.2	11.8	13100	0	0	0	0	0	0	0	0	0	0	0	0	0	6	0	2022	0	0	0	0
36780514	2802679	HAMZA	ÇİL	1948-03-01	E	76	0	0	0	0	45	41	1.3	12.3	15000	1	1	0	0	1	0	0	0	0	0	0	0	0	6	0	2022	0	0	0	0
36814993	366061	SEDAT	COŞKUN	1979-02-12	E	45	0	0	0	0	22	39	1.1	13.6	16000	1	1	0	0	1	0	0	0	0	0	0	0	0	6	0	2022	0	0	0	0
36909728	1579188	NECİP	TEKİN	1963-02-05	E	61	0	0	0	0	22	12	1.9	13.2	7100	1	1	0	0	2	0	0	0	0	0	0	0	0	6	0	2022	0	0	0	0
37034500	44586	MUSTAFA	ULUCAAĞAÇ	1956-05-20	E	68	0	0	0	0	12	20	1.8	11.1	14900	0	0	0	0	0	0	0	0	0	0	0	0	0	6	0	2022	0	0	0	0
37338791	1073556	LEVENT	ÇELİKDAĞ	1963-05-01	E	61	0	0	0	0	10	35	1.6	13	17300	0	0	0	0	0	0	0	0	0	0	0	0	0	6	0	2022	0	0	0	0
37432907	4344972	MEHMET EMİN	DEMİRAĞ	1944-04-04	E	80	0	0	0	0	33	14	1.7	11.8	9800	1	1	0	0	1	0	0	0	0	0	0	0	0	6	0	2022	0	0	0	0
37510442	3330918	HÜSEYİN	KOÇ	1958-02-18	E	66	0	0	0	0	16	8	2	12.7	11400	1	1	0	0	1	0	0	0	0	0	0	0	0	6	0	2022	0	0	0	0
37514057	3254735	TUNCAY	TANRIVERDİ	1954-06-20	E	70	0	0	0	0	22	28	1.3	12.4	8800	1	1	0	0	1	0	0	0	0	0	0	0	0	6	0	2022	0	0	0	0
37521074	322811	ASLAN	ARAS	1943-04-03	E	81	0	0	0	0	15	17	1.7	12.3	17500	0	0	0	0	0	0	0	0	0	0	0	0	0	6	0	2022	0	0	0	0
37646504	868699	ALİ	GEROĞLU	1947-10-01	E	76	0	0	0	0	9	16	0.6	12.6	9100	1	1	1	0	1	0	0	0	0	0	0	0	0	6	0	2022	0	0	0	0
37905401	1448766	OSMAN	YILDIZ	1949-03-11	E	75	0	0	0	0	12	40	0.3	12.7	12200	1	1	0	0	2	0	0	0	0	0	0	0	0	6	0	2022	0	0	0	0
37914002	3749956	HASAN HÜSEYİN	ATILGAN	1956-03-13	E	68	0	0	0	0	25	38	1.3	14	4300	1	1	0	0	1	0	0	0	0	0	0	0	0	6	0	2022	0	0	0	0
37914190	367749	RAMAZAN	ŞENTÜRK	1960-03-13	E	64	0	0	0	0	41	14	1.7	11.6	10100	1	1	0	0	1	0	0	0	0	0	0	0	0	6	0	2022	0	0	0	0
37961386	873323	SÜLEYMAN	ÇEKİÇ	1952-12-15	E	71	0	0	0	0	29	38	0.7	13.6	16600	0	0	0	0	0	0	0	0	0	0	0	0	0	6	0	2022	0	0	0	0
38153277	4121486	CÜNEYT ZİYA	TÜRKUÇAK	1958-05-06	E	66	0	0	0	0	37	29	1.2	11.3	15600	1	1	0	0	1	0	0	0	0	0	0	0	0	6	0	2022	0	0	0	0
38251585	93882	NAZMİ	UYSAL	1955-02-16	E	69	0	0	0	0	27	36	1	13.6	14900	0	0	0	0	0	0	0	0	0	0	0	0	0	6	0	2022	0	0	0	0
38275528	4196529	NECMETTİN	DURAK	1951-08-06	E	73	0	0	0	0	22	40	0.6	11.3	12900	0	0	0	0	0	0	0	0	0	0	0	0	0	6	0	2022	0	0	0	0
38513406	821145	NAİM	ŞAHİN	1952-06-15	E	72	0	0	0	0	18	15	0.8	15.1	9800	0	0	0	0	0	0	0	0	0	0	0	0	0	6	0	2022	0	0	0	0
38544130	166571	BAKİ	BULUT	1965-10-05	E	58	0	0	0	0	13	16	0.8	12.8	6600	0	0	0	0	0	0	0	0	0	0	0	0	0	6	0	2022	0	0	0	0
38818331	1177408	CENGİZ	GÜLEN	1964-11-02	E	59	0	0	0	0	18	17	0.7	11.8	6700	0	0	0	0	0	0	0	0	0	0	0	0	0	6	0	2022	0	0	0	0
38852743	537235	MEHMET EMİN	KARAASLAN	1962-01-01	E	62	0	0	0	0	14	16	0.5	14.5	10500	1	1	0	0	1	0	0	0	0	0	0	0	0	6	0	2022	E. CLOACAE	0	0	0
38858059	4225145	ERDOĞAN	ÖZTÜRK	1959-12-12	E	64	0	0	0	0	18	16	0.6	14.8	7500	0	0	0	0	0	0	0	0	0	0	0	0	0	6	0	2022	E. COLİ	1	0	0
33130045	1013847	SÜLEYMAN	NİŞANCI	1953-01-01	E	71	0	0	0	0	18	11	1.5	15.4	11800	0	0	0	0	0	0	0	0	0	0	0	0	0	6	0	2018	0	0	0	0
33621832	3793126	DOĞAN	EKER	1964-03-03	E	60	1	1	0	0	33	19	1.3	13	6900	0	0	0	0	0	0	0	0	0	0	0	0	0	6	0	2021	E. FECALİS	0	1	0
40381576	544286	FEVZİ	SAYIN	1952-07-13	E	72	1	1	0	0	12	28	0.7	11.8	6700	0	0	0	0	0	0	0	0	0	0	0	0	0	6	0	2023	0	0	0	0
33975852	739013	OSMAN	ÇANLI	1948-03-13	E	76	1	1	0	0	19	33	0.9	12.8	6800	0	0	0	0	0	0	0	0	0	0	0	0	0	6	0	2023	E. COLİ	1	0	0
34090128	972337	HASAN	TOSUN	1943-06-15	E	81	1	1	0	0	11	68	0.8	11	9200	0	0	0	0	0	0	0	0	0	0	0	0	0	6	0	2023	0	0	0	0
32989592	1076602	İSMAİL	AZGIN	1945-10-26	E	79	0	0	0	0	15	15	0.8	12.4	7200	0	0	0	0	0	0	0	0	0	0	0	0	0	6	0	2018	0	0	0	0
33691156	1100204	ABDULLAH	ALŞAN	1954-03-08	E	70	0	0	0	0	16	9	1.1	11.5	8200	1	1	1	0	0	1	0	0	0	0	0	0	0	6	0	2018	0	0	0	0
33769650	1248356	ABDULLAH	DOYAR	1944-01-08	E	76	0	0	0	0	14	11	0.76	10.2	8100	1	1	0	1	1	1	0	0	0	0	0	0	0	6	0	2018	E.coli, E.faecalis, Pseudomonas, Proteus	1	1	0
41155146	1295502	HUSEYİN	KAYABAŞ	1963-09-15	E	61	0	0	0	0	20	16	0.91	15.4	8100	1	1	0	1	0	0	0	0	0	0	0	0	0	6	0	2018	0	0	0	0
33268743	1311940	ABDÜLKADİR	BAĞCI	1966-02-02	E	58	0	0	0	0	21	19	1.07	16.8	5200	0	0	0	0	0	0	0	0	0	0	0	0	0	6	0	2018	0	0	0	0
34248386	1515975	SABRİ	ATİK	1955-03-10	E	69	0	0	0	0	23	21	0.94	13.4	6300	0	0	0	0	0	0	0	0	0	0	0	0	0	6	0	2018	0	0	0	0
41959544	1670801	MANSUR	ÜZREK	1957-01-01	E	67	0	0	0	0	12	14	1.18	16.2	11600	1	1	0	1	0	0	0	0	0	0	0	0	0	6	0	2018	E.coli	0	0	0
32969834	1705564	ZİVER	ERDEM	1965-02-01	E	59	0	0	0	0	19	19	1	14.4	6400	0	0	0	0	0	0	0	0	0	0	0	0	0	6	0	2018	0	0	0	0
34139074	1730461	NAMIK	ERTÜRK	1947-10-01	E	77	0	0	0	0	19	17	1.2	12.3	8600	1	1	0	1	0	0	0	0	0	0	0	0	0	6	0	2018	Morganella morgagni, E.faecalis, E.coli	1	1	0
35448825	191298	HAMİT	MİRAZLI	1930-07-01	E	90	0	0	0	0	190	430	1.3	12.8	7700	1	1	0	1	0	0	0	0	0	0	0	0	0	6	0	2018	E. faecalis	0	1	0
41721871	2288076	NEDIM	KUTLU	1963-09-01	E	60	0	0	0	0	33	47	1	11.1	5900	0	0	0	0	0	0	0	0	0	0	0	0	0	6	0	2024	0	0	0	0
33708998	231947	BAYRAM	ŞEKER	1932-09-01	E	92	0	0	0	0	11	8	0.8	6	9900	0	0	0	0	0	0	0	0	0	0	0	0	0	6	0	2019	Acinetobacter spp.	0	0	0
33508564	262610	SADIK	İNCEKARA	1942-04-26	E	82	0	0	0	0	18	13	1.4	11.6	6200	0	0	0	0	0	0	0	0	0	0	0	0	0	6	0	2017	0	0	0	0
33753701	264628	SEYAT	KARAKAŞ	1950-03-19	E	74	0	0	0	0	15	15	1	13.1	7600	0	0	0	0	0	0	0	0	0	0	0	0	0	6	0	2017	0	0	0	0
33242681	2772990	RECEP	YASLI	1965-04-05	E	59	0	0	0	0	16	7	0.82	15.3	9000	0	0	0	0	0	0	0	0	0	0	0	0	0	5	0	2018	0	0	0	0
33387210	2845588	MEHMET ZEKİ	DAŞTAN	1941-04-01	E	83	0	0	0	0	20	13	1.1	14.2	8200	0	0	0	0	0	0	0	0	0	0	0	0	0	6	0	2018	0	0	0	0
33077725	2952019	MEHMET SALİH	GÜLER	1960-11-24	E	63	0	0	0	0	31	52	0.8	14	7300	0	0	0	0	0	0	0	0	0	0	0	0	0	6	0	2018	0	0	0	0
34547927	314587	HALİL	DUMAN	1952-06-26	E	72	0	0	0	0	27	24	0.6	13.7	14000	1	1	0	0	1	0	0	0	0	0	0	0	0	6	0	2020	0	0	0	0
34547343	3158611	SEBAHATTİN	MAKİNİST	1949-07-01	E	75	0	0	0	0	23	22	1.4	12.4	13000	1	1	0	0	1	1	0	0	0	0	0	0	0	6	0	2020	E. FECALİS	0	1	0
35373499	3170298	ŞENTÜRK	URUŞ	1950-04-12	E	74	0	0	0	0	56	25	1.8	13	18600	1	1	0	0	1	0	0	0	0	0	0	0	0	6	0	2020	0	0	0	0
40372428	3199786	İBRAHİM	AFYONCU	1954-02-02	E	70	0	0	0	0	19	24	1.2	13	5300	0	0	0	0	0	0	0	0	0	0	0	0	0	6	0	2020	0	0	0	0
39171214	3323948	İLHAN	DOĞAN	1966-05-02	E	58	0	0	0	0	25	20	1.3	14	7400	0	0	0	0	0	0	0	0	0	0	0	0	0	6	0	2020	0	0	0	0
33077332	3442809	CANDAŞ	KANCEVİZOĞLU	1962-04-11	E	62	0	0	0	0	26	25	1.1	15.5	3300	0	0	0	0	0	0	0	0	0	0	0	0	0	6	0	2021	0	0	0	0
34547514	3470567	METİN	ÇELİKTEN	1946-10-05	E	77	0	0	0	0	22	23	0.9	13.8	10000	0	0	0	0	0	0	0	0	0	0	0	0	0	6	0	2021	0	0	0	0
34658331	3608832	İSMET	KOÇ	1954-02-10	E	70	0	0	0	0	44	21	1.1	11	11000	0	0	0	0	0	0	0	0	0	0	0	0	0	6	0	2021	0	0	0	0
33622597	3643751	SAİM	ARSLAN	1969-09-11	E	54	0	0	0	0	27	17	0.9	12.5	7000	0	0	0	0	0	0	0	0	0	0	0	0	0	6	0	2021	0	0	0	0
39269066	3659807	MEHMET	GÜLER	1954-03-24	E	70	0	0	0	0	22	26	0.8	12.6	11700	0	0	0	0	0	0	0	0	0	0	0	0	0	6	0	2021	0	0	0	0
34643852	3705094	BURAN	UYAR	1954-07-12	E	70	0	0	0	0	28	44	1.1	13	15500	0	0	0	0	0	0	0	0	0	0	0	0	0	6	0	2021	0	0	0	0
33665487	3861058	NEJDET	ÖZENLER	1955-10-16	E	68	0	0	0	0	23	27	0.9	13.6	13000	1	1	0	0	3	0	0	0	0	0	0	0	0	6	0	2021	0	0	0	0
33268379	3873341	HALİS	KOÇAK	1960-07-01	E	64	0	0	0	0	18	25	1	13.7	14300	1	1	0	0	1	0	0	0	0	0	0	0	0	6	0	2021	0	0	0	0
33857596	397050	İBO	ÇELİK	1934-01-01	E	90	0	0	0	0	11	68	0.6	12.2	12000	0	0	0	0	0	0	0	0	0	0	0	0	0	6	0	2022	0	0	0	0
39096153	3972092	ADEM	DALKIRAN	1948-07-01	E	76	0	0	0	0	33	21	0.8	8.8	14250	1	1	0	0	1	0	0	0	0	0	0	0	0	6	0	2022	0	0	0	0
40549161	4083680	ZİHNİ	AKKILIÇ	1950-01-15	E	74	0	0	0	0	20	22	0.6	11.9	14400	1	1	1	0	2	0	0	0	0	0	0	0	0	6	0	2023	0	0	0	0
33725969	4085355	AHMET	BARUT	1939-12-08	E	84	0	0	0	0	15	51	0.9	12.8	13200	0	0	0	0	0	0	0	0	0	0	0	0	0	6	0	2023	0	0	0	0
41495888	4090327	ABDURRAHMAN	BABAOĞLU	1943-05-27	E	81	0	0	0	0	18	33	1.1	2024-05-10	13400	1	1	0	0	3	0	0	0	0	0	0	0	0	6	0	2023	0	0	0	0
35322652	4227459	MUSTAFA	TÜRE	1961-01-02	E	63	0	0	0	0	19	20	0.9	2024-08-09	12900	0	0	0	0	0	0	0	0	0	0	0	0	0	6	0	2023	0	0	0	0
41462967	4240602	BÜLENT	ELMASCIGİL	1972-07-09	E	52	0	0	0	0	34	9	0	10	13400	1	1	0	0	2	0	0	0	0	0	0	0	0	6	0	2023	M. MORGANII	0	0	0
39886750	4247684	ÖZCAN	DOĞU	1966-06-02	E	58	0	0	0	0	35	27	0.3	11.5	18000	0	0	0	0	0	0	0	0	0	0	0	0	0	6	0	2023	0	0	0	0
40752048	4576537	ÇETİN	DOĞAN	1969-11-09	E	54	0	0	0	0	22	23	0.8	15.1	9800	0	0	0	0	0	0	0	0	0	0	0	0	0	6	0	2023	0	0	0	0
41166180	4608627	NUH	GÜNEŞ	1980-01-28	E	44	0	0	0	0	20	18	0.9	13	6400	0	0	0	0	0	0	0	0	0	0	0	0	0	6	0	2023	0	0	0	0
40056578	528248	MUSTAFA	AKSÖZ	1953-01-01	E	71	0	0	0	0	15	18	2.1	12.5	14500	1	1	1	1	1	1	0	0	0	0	0	0	0	6	0	2023	E. FECALİS	0	1	0
39147487	569252	TEMEL	SOYDAŞ	1960-02-03	E	64	0	0	0	0	16	28	1	12.9	15300	1	1	1	0	1	0	0	0	0	0	0	0	0	6	0	2023	0	0	0	0
41992639	587199	AHMET	TEKE	1949-01-10	E	75	0	0	0	0	25	42	0.7	13.8	11450	0	0	0	0	0	0	0	0	0	0	0	0	0	6	0	2023	0	0	0	0
40767275	59216	ALİ	KILIÇ	1954-04-15	E	70	0	0	0	0	17	27	0.8	12.8	6600	0	0	0	0	0	0	0	0	0	0	0	0	0	6	0	2023	0	0	0	0
33269307	635992	YAHYA	ÖZTÜRK	1936-01-13	E	88	0	0	0	0	26	22	0.9	13	10700	0	0	0	0	0	0	0	0	0	0	0	0	0	6	0	2023	0	0	0	0
39815224	821661	SÜLEYMAN	ALDAĞ	1969-06-05	E	55	0	0	0	0	27	23	0.8	14	12700	1	1	0	0	3	0	0	0	0	0	0	0	0	6	0	2023	0	0	0	0
34191547	853463	ARSLAN	ÇELİK	1960-03-08	E	64	0	0	0	0	23	27	1.3	11.7	8900	1	1	0	0	2	0	0	0	0	0	0	0	0	6	0	2023	0	0	0	0
39040500	916429	MEHMET MURAT	GÖÇÜK	1946-01-11	E	78	0	0	0	0	14	28	1.1	11.6	10700	0	0	0	0	0	0	0	0	0	0	0	0	0	6	0	2023	0	0	0	0
41432787	990490	KAMİL	AKSU	1954-01-01	E	70	0	0	0	0	16	48	0.9	9.9	7900	0	0	0	0	0	0	0	0	0	0	0	0	0	6	0	2023	0	0	0	0
33770390		HÜSEYİN	DOĞAN	1939-07-22	E	85	0	0	0	0	15	15	2024-01-01	13	7700	0	0	0	0	0	0	0	0	0	0	0	0	0	6	0	2023	0	0	0	0
39861666	3017373	SALİH	KINIK	1968-06-04	E	56	1	1	1	1	20	22	0.95	15.2	7200	1	1	0	0	0	1	0	0	0	0	0	0	0	1	1	2019	0	0	0	ex
38909721	3559648	ALİ	KOYUNCU	1953-02-20	E	71	1	0	0	1	23	25	0.9	16.9	6200	1	1	0	0	0	1	0	0	0	0	0	0	0	1	1	2021	0	0	0	0
33786163	3652425	MUSTAFA	ÖZSOY	1943-09-20	E	80	1	0	1	0	29	19	0.6	13	14000	1	1	0	1	0	2	0	0	0	0	0	0	0	5	1	2021	E. COLi	1	0	komplikasyon
38455399	593888	İLYAS	TURGAY	1953-02-03	E	71	0	0	0	0	19	24	0.5	14.1	6800	0	0	0	0	0	0	0	0	0	0	0	0	0	6	1	2022	0	0	0	0
38456276	4040891	MEHMET ALİ	SAKIZCI	1966-08-11	E	58	0	0	0	0	16	12	0.8	12.5	12200	1	1	0	0	0	1	0	0	0	0	0	0	0	6	1	2022	K.PNEUMONIAE	0	0	0
38598784	4502148	İBRAHİM	KORUK	1966-03-10	E	58	0	0	0	0	17	16	0.7	14	4600	1	1	0	0	2	0	0	0	0	0	0	0	0	5	1	2022	0	0	0	0
34803136	101712	SABRİ	ÇETİNKAYA	1946-03-01	E	75	0	0	0	0	59	30	1.5	15.6	5600	1	1	1	0	1	1	0	0	0	0	0	0	0	1	1	2018	0	0	0	0
39163973	2501865	MEHMET	BAŞOĞLU	1940-01-20	E	84	0	0	0	0	18	16	1	12.4	5900	1	1	1	0	0	0	0	0	0	0	0	0	0	6	1	2023	0	0	0	0
32997797	2903594	OSMAN	ENÇ	1949-12-03	E	74	0	0	0	0	29	26	0.9	10.8	7900	1	1	0	1	0	0	0	0	0	0	0	0	0	6	1	2018	0	0	0	0
32997727	317778	OSMAN	GÜNGÖR	1947-02-08	E	77	0	0	0	0	19	16	1.1	14.8	6600	0	0	0	0	0	0	0	0	0	0	0	0	0	6	1	2020	0	0	0	0
32998166	3458481	MAHMUT	SEVİNÇ	1963-03-02	E	61	0	0	0	0	21	8	1	11	6800	1	1	1	0	0	0	0	0	0	0	0	0	0	6	1	2021	0	0	0	0
38915275	4274061	NURTEN	CEYLAN	1941-02-10	E	83	0	0	0	0	29	16	1.2	14.1	6800	0	0	0	0	0	0	0	0	0	0	0	0	0	6	1	2023	0	0	0	0
41336426	4499775	DOĞAN	KOCATEPE	1960-05-25	E	64	0	0	0	0	30	22	1.1	12.5	12200	1	1	0	0	0	1	0	0	0	0	0	0	0	6	1	2023	K.PNEUMONIAE	0	0	0
41521813	4606066	İBRAHİM	ŞAKTAN	1953-03-20	E	71	0	0	0	0	21	11	0.7	12.8	4000	1	1	0	0	2	0	0	0	0	0	0	0	0	5	1	2023	0	0	0	komplikasyon
38430908	562698	NURETTİN	MERCAN	1958-03-01	E	66	1	0	0	1	12	24	1.1	11	17100	1	1	0	1	1	1	0	0	0	0	0	0	0	6	2	2022	0	0	0	0
41872115	4267142	SEMO	AHMED	1962-01-01	E	62	1	0	1	0	32	14	0.7	11.9	16100	1	1	0	1	1	1	0	0	0	0	0	0	0	6	2	2023	0	0	0	0
42111309	995101	SÜLEYMAN	AKBULUT	1970-02-07	E	54	1	0	1	1	39	28	0.7	11.4	9200	1	1	1	1	1	1	0	0	0	0	0	0	0	6	3	2023	E. COLİ	1	0	0
33490271	3255372	MUSTAFA	AKTUĞ	1942-09-06	E	81	1	0	0	1	40	18	1.1	11	11000	1	1	1	1	1	1	0	0	0	0	0	0	0	6	3	2020	E. COLİ	1	0	0
35656365	3349485	İBRAHİM	ÇELİK	1949-01-09	E	75	1	0	1	0	10	20	1.3	12.6	12400	1	1	1	1	2	1	0	0	0	0	0	0	0	6	3	2021	E. FECALİS	0	1	0
39378328	563636	ERDİNÇ	YETER	1969-01-22	E	55	1	0	1	0	26	41	1.1	11	13000	1	1	1	1	0	1	0	0	0	0	0	0	0	6	3	2023	E. COLİ	1	0	0
37436578	3963781	MURAT	TOSUN	1955-03-01	E	69	0	0	0	0	11	9	0.4	13.2	4900	1	1	1	1	3	1	0	0	0	0	0	0	0	6	3	2022	E. COLİ	1	0	0
38132918	129867	HALİL	PINAR	1946-04-21	E	78	0	0	0	0	39	28	0.7	11.4	9200	1	1	1	1	1	1	0	0	0	0	0	0	0	6	3	2022	E. COLİ	1	0	0
34399915	317213	TEVFİK	ÇAKMAK	1945-08-01	E	79	1	1	0	0	22	17	0.9	13.5	16000	1	1	1	1	0	1	0	0	0	0	0	0	0	3	3	2020	E.coli	1	0	komplikasyon
41600075	3839161	AYHAN	TATAROĞLU	1947-06-23	E	77	1	1	0	0	21	36	1.2	12	12400	1	1	1	1	0	1	0	0	0	0	0	0	0	6	3	2021	E. COLİ	1	0	0
34360338	3911820	İSMET	ŞEN	1947-07-01	E	77	1	1	0	0	24	20	1	13.1	11400	1	1	1	1	2	1	0	0	0	0	0	0	0	6	3	2021	E. FECALİS	0	1	0
39358983	811170	MEHMET	SÖYLER	1950-01-01	E	74	1	1	0	0	36	21	1.1	11	13000	1	1	1	1	0	1	0	0	0	0	0	0	0	6	3	2023	E. COLİ	1	0	0
34456336	4156290	İSMET HAKKI	AVCI	1948-05-26	E	76	0	0	0	0	49	38	0.9	12.8	8900	1	1	1	1	1	1	0	0	0	0	0	0	0	6	3	2023	E. COLİ	1	0	0
35023000	4185104	SEZAYİ	GÜLEÇ	1960-08-27	E	64	0	0	0	0	25	17	0.4	12.8	16400	1	1	0	1	0	1	0	0	0	0	0	0	0	6	3	2023	E. COLİ	1	0	0
39896555	2611865	ABDULLAH	EYGAY	1950-09-20	E	73	1	0	1	1	13	10	0.9	14.9	8800	1	1	0	0	0	1	0	0	0	0	0	0	0	4	4	2023	E.faecium	0	1	kayıp
37914800	992883	METİN	DÜLGER	1956-12-01	E	67	1	1	0	1	22	11	0.7	11.4	6900	1	1	1	1	0	1	0	0	0	0	0	0	0	6	4	2022	K.PNEUMONIAE	0	0	0
38121370	4423982	HALİT	YALINSU	1949-11-25	E	74	1	0	0	1	14	43	0	11.6	11000	1	1	1	1	2	1	0	0	0	0	0	0	0	6	4	2022	E. FECALİS	0	1	0
34179229	4092601	HÜSAMETTİN	GÖÇMEN	1958-01-06	E	66	1	1	1	0	16	32	0.5	11.8	11000	1	1	1	1	2	1	0	0	0	0	0	0	0	6	4	2023	E. FECALİS	0	1	0
35549468	3977215	ABDULLAH	GEZEN	1955-05-20	E	69	1	0	1	0	42	12	1.5	12	15600	1	1	1	1	3	1	0	0	0	0	0	0	0	6	4	2021	E. FECALİS	0	1	0
36909712	507344	MUHARREM	ÇAKMAK	1965-08-23	E	59	1	0	1	0	26	16	1.7	13.7	16000	1	1	1	1	1	1	0	0	0	0	0	0	0	6	4	2022	E. FECALİS	0	1	0
40854597	1531652	CEMAL	ERĞUN	1963-04-01	E	61	1	0	1	0	28	19	1.03	10.4	17300	1	1	1	0	1	1	0	0	0	0	0	0	0	4	4	2018	Klebsiella pneumonia	0	0	0
34153311	393825	REŞAT	FIRTINA	1950-04-23	E	74	1	0	1	0	31	25	1.2	16	15100	1	1	0	0	1	1	0	0	0	0	0	0	0	6	4	2022	E. FECALİS	0	1	0
	930994	RUHİ	YAVUZ	1940-10-01	E	84	1	0	1	0	25	31	1.0	15	14000	1	1	0	0	1	1	0	0	0	0	0	0	0	6	4	2023	E.faecalis	0	1	0
35559159	3231162	CİHAT	VEYSELLİ	1952-12-21	E	71	0	0	0	0	23	18	0.6	13	8600	1	1	1	1	1	1	0	0	0	0	0	0	0	6	4	2021	E. FECALİS	0	1	0
35927882	992841	İSMAİL	KURNAZ	1952-05-04	E	72	0	0	0	0	15	13	1.4	11.5	16400	1	1	0	1	2	1	0	0	0	0	0	0	0	6	4	2021	0	0	0	0
36025854	62663	KASIM	AKPINAR	1949-02-02	E	75	0	0	0	0	21	8	1.5	13.8	14000	1	1	1	1	1	1	0	0	0	0	0	0	0	6	4	2021	K.PNEUMONIAE	0	0	0
38533848	110354	SÜLEYMAN	YÖRÜK	1960-03-24	E	64	0	0	0	0	14	18	1.48	14.1	11500	1	1	1	1	0	1	0	0	0	0	0	0	0	6	4	2022	K.PNEUMONIAE	0	0	0
40325973	3354837	RECEP	DURGUT	1957-01-01	E	67	1	1	0	0	22	26	1.1	12.6	12000	1	1	0	0	0	1	0	0	0	0	0	0	0	4	4	2021	E.faecium	0	1	komplikasyon
35148410	3232332	KAZIM	AVCI	1947-08-29	E	77	0	0	0	0	24	23	1	9.8	13500	1	1	1	1	2	1	0	0	0	0	0	0	0	6	4	2020	E. FECALİS	0	1	0
35265757	339160	BAYRAM	EMİR	1937-01-15	E	87	0	0	0	0	23	22	1	11.7	11700	1	1	0	1	0	1	0	0	0	0	0	0	0	4	4	2021	0	0	0	komplikasyon
35701722	3021470	ARİF	TOP	1942-02-08	E	82	0	0	0	0	29	13	1.9	11.9	16800	1	1	1	0	1	0	0	0	0	0	0	0	0	6	5	2021	0	0	0	0
37567486	1171951	AYDIN	BİNGÖL	1961-09-20	E	62	1	0	0	1	43	38	1.4	13.7	11300	1	1	1	1	1	1	0	0	0	0	0	0	0	6	6	2022	K.PNEUMONIAE	0	0	0
33370392	3069065	MEHMET ADİL	YALMAN	1956-11-28	E	67	1	0	0	1	32	34	1.1	13.4	7400	1	1	0	1	0	0	0	0	0	0	0	0	0	6	6	2019	E.faecalis	0	1	0
37827633	4364435	RAMAZAN KAMİL	DEMLİ	1951-06-26	E	73	1	0	1	0	44	41	1.2	11	11600	1	1	0	1	3	1	0	0	0	0	0	0	0	6	6	2022	E. CLOACAE	0	0	0
39618589	1080673	MEHMET ALİ	BEZİRKAN	1969-02-20	E	55	1	0	1	0	15	18	1.55	11.6	8500	1	1	0	1	1	1	0	0	0	0	0	0	0	6	6	2018	S. epidermidis	0	0	0
39045060	1341738	CAFER	GEZER	1956-08-12	E	68	0	0	0	0	13	17	0.85	11.8	9400	1	1	0	1	0	0	0	0	0	0	0	0	0	6	6	2018	S.epidermidis	0	0	0
33726588	1460377	HÜSEYİN	DOĞAN	1939-07-22	E	81	0	0	0	0	17	12	1.2	12.2	5900	1	1	0	1	0	1	0	0	0	0	0	0	0	6	6	2018	E. cloacea	0	0	0
34200348	1477962	MUHARREM	ÖNER	1947-02-15	E	73	0	0	0	0	16	13	0.76	12.5	7500	1	1	0	1	0	0	0	0	0	0	0	0	0	6	6	2018	0	0	0	0
39279430	1552996	İLYAS	DOĞAN	1940-03-01	E	84	0	0	0	0	13	6	0.63	9.4	9000	1	1	0	1	0	0	0	0	0	0	0	0	0	6	6	2018	Klebsiella pneumonia, E. faecalis	0	1	0
40980440	2298340	SİNAN	EDEMEN	1966-01-01	E	53	0	0	0	0	23	15	0.97	13.7	7600	1	1	1	0	0	0	0	0	0	0	0	0	0	6	6	2019	0	0	0	0
39594717	303716	HASAN	YÜCEL	1957-05-02	E	67	0	0	0	0	25	16	1.06	14.1	6600	0	0	0	0	0	0	0	0	0	0	0	0	0	6	6	2023	E.coli	1	0	0
39540285	3135835	NACİ	YAMAN	1950-01-10	E	74	0	0	0	0	22	8	0.7	13	4200	1	1	0	0	1	0	0	0	0	0	0	0	0	6	6	2019	0	0	0	0
35535124	1601184	FATMA	SEVGİ	1953-01-01	K	71	1	0	0	1	33	20	0.2	11.3	14900	1	1	0	0	1	0	0	0	0	0	0	0	0	6	0	2021	E. FECALİS	0	1	0
35558912	307910	AYŞE	PEK	1937-05-15	K	87	1	0	0	1	25	16	1.2	11.7	4700	0	0	0	0	0	0	0	0	0	0	0	0	0	6	0	2021	0	0	0	0
33396573	380836	EMİNE	VARDARBAŞI	1948-04-02	K	76	1	0	0	1	18	22	0.8	12.1	6700	0	0	0	0	0	0	0	0	0	0	0	0	0	6	0	2021	0	0	0	0
35133555	734444	SULTAN	KOÇ	1943-05-01	K	81	1	1	1	0	18	22	2.1	12.5	14000	1	1	1	1	1	1	0	0	0	0	0	0	0	6	0	2023	E. FECALİS	0	1	0
35559428	4043091	SANEM	CAMADAN	1980-04-24	K	44	1	0	1	0	38	14	0.1	12	5500	1	1	0	0	2	0	0	0	0	0	0	0	0	6	0	2021	0	0	0	0
41515700	183084	FATMA	SANDULAÇ	1948-12-05	K	75	1	0	1	0	17	17	0.76	12.2	5610	0	0	0	0	0	0	0	0	0	0	0	0	0	6	0	2018	0	0	0	0
39626440	4184341	PERİHAN	DEMİR	1960-02-01	K	64	1	0	1	0	24	16	1.5	11.9	10700	0	0	0	0	0	0	0	0	0	0	0	0	0	6	0	2023	0	0	0	0
41973500	568196	EMİNE	ÇOBANOĞLU	1958-12-15	K	65	1	0	1	0	17	24	0.8	14	12700	1	1	0	0	3	0	0	0	0	0	0	0	0	6	0	2023	0	0	0	0
35792911	528915	SERVET	URHAN	1961-05-05	K	63	0	0	0	0	28	36	1.1	12.6	11100	1	1	0	0	2	0	0	0	0	0	0	0	0	6	0	2021	0	0	0	0
36551398	362653	ESMA	KAYALI	1962-01-01	K	62	0	0	0	0	14	39	1.6	11.5	4600	0	0	0	0	0	0	0	0	0	0	0	0	0	6	0	2022	0	0	0	0
36713929	437093	SEDEGÜL	KAYGISIZ	1963-03-12	K	61	0	0	0	0	14	17	1	13.5	7800	0	0	0	0	0	0	0	0	0	0	0	0	0	6	0	2022	0	0	0	0
37988850	12659	SELİME	ÖZ	1936-07-01	K	88	0	0	0	0	13	7	1.1	13.8	5700	0	0	0	0	0	0	0	0	0	0	0	0	0	6	0	2022	0	0	0	0
38772756	2831796	SAKİNE	ARNAVUT	1970-03-20	K	54	0	0	0	0	10	11	1.6	13	6950	0	0	0	0	0	0	0	0	0	0	0	0	0	6	0	2022	0	0	0	0
38811653	516799	HÜLYA	AKGÜL	1971-11-26	K	52	0	0	0	0	21	24	0.9	12.8	6800	0	0	0	0	0	0	0	0	0	0	0	0	0	6	0	2022	E. COLİ	1	0	0
38009803	264460	VESİLE	ALTUN	1954-11-15	K	69	1	1	0	0	10	27	0.6	12.8	14400	1	1	1	0	2	0	0	0	0	0	0	0	0	6	0	2022	0	0	0	0
35448103	4235357	SABİRE OYA	ADAMAN	1953-02-12	K	71	1	1	0	0	30	16	0.3	11.8	17700	1	1	1	0	3	0	0	0	0	0	0	0	0	6	0	2023	K.PNEUMONIAE	0	0	0
39901483	1716578	AYTEN	BOLYURT	1973-06-10	K	51	0	0	0	0	21	20	0.79	14.3	5500	0	0	0	0	0	0	0	0	0	0	0	0	0	6	0	2018	0	0	0	0
39917693	3902257	EMİNE	BELEVİ	1950-12-01	K	73	0	0	0	0	27	23	1.1	12.4	9300	1	1	0	0	2	0	0	0	0	0	0	0	0	6	0	2021	0	0	0	0
33380059	4023023	NERİMAN	AKYOL	1935-07-01	K	89	0	0	0	0	10	35	1.5	9.3	14000	0	0	0	0	0	0	0	0	0	0	0	0	0	6	0	2022	0	0	0	0
34705925	4166811	SEVİM	KAHRAMANTÜRK	1954-09-08	K	69	0	0	0	0	27	49	0.9	11.5	12400	1	1	0	0	1	0	0	0	0	0	0	0	0	6	0	2023	0	0	0	0
36080085	1328664	HAVVA	ULUĞ	1936-07-01	K	88	0	0	0	0	15	36	0.2	12.6	5500	1	1	1	1	0	1	0	0	0	0	0	0	0	6	1	2021	E. COLİ	1	0	0
33352784	3496737	İSMET	ÖZMEN	1938-03-19	K	86	0	0	0	0	28	24	1.1	11	11000	1	1	0	1	0	0	0	0	0	0	0	0	0	6	1	2021	0	0	0	0
34659438	5993	NEŞE	SEVERGE	1960-12-14	K	63	0	0	0	0	19	29	0.7	14	12400	1	1	0	1	0	2	0	0	0	0	0	0	0	5	1	2023	0	0	0	komplikasyon
38254447	4422943	GÜLTEN	DAŞDEMİR	1940-09-08	K	83	1	0	1	1	26	17	1.6	12.8	16400	1	1	0	1	0	1	0	0	0	0	0	0	0	6	3	2022	0	0	0	0
39083314	2457059	NURTEN	EKER	1948-06-26	K	76	1	0	1	0	12	7	0.95	14.1	9400	1	1	0	1	0	0	0	0	0	0	0	0	0	3	3	2020	E.coli	1	0	ex
35573554	4153500	KADRİYE	BOZKURT	1958-04-17	K	66	0	0	0	0	46	21	1.6	12.7	13000	1	1	1	1	0	1	0	0	0	0	0	0	0	6	3	2021	E. COLİ	1	0	0
41720223	888662	NİLGÜN	ŞAFAK	1966-06-04	K	58	0	0	0	0	20	24	1.2	12.6	12400	1	1	1	1	2	1	0	0	0	0	0	0	0	6	3	2023	E. FECALİS	0	1	0
38492600	883375	MEVLÜDE	YILMAZ	1980-02-10	K	44	1	1	1	1	18	18	0.2	11.9	13600	1	1	1	1	2	1	0	1	0	0	0	0	0	4	4	2022	K.PNEUMONIAE	0	0	sepsis
35801757	1654565	ZEKİYE	TUNÇÇEKİÇ	1970-01-01	K	54	1	0	1	1	15	40	0.5	11.1	10900	1	1	0	1	2	1	0	0	0	0	0	0	0	6	4	2021	E. COLİ	1	0	0
34140772	196088	HAVVA	FETAH	1946-07-01	K	78	0	0	0	0	20	26	1.1	9.9	14000	1	1	1	0	0	1	0	0	0	0	0	0	0	6	4	2018	E.coli	1	0	0
34153141	457675	ELVAN	PERİŞAN	1952-02-25	K	72	0	0	0	0	24	19	1.48	14.1	15300	1	1	1	1	0	1	0	0	0	0	0	0	0	6	4	2023	E. COLİ	1	0	0
33242716	1108458	FATİME	KIRAN	1952-07-01	K	72	0	0	0	0	21	24	0.65	14.1	6700	1	1	0	1	0	1	0	0	0	0	0	0	0	6	6	2018	S. agalactia, E.faecalis	0	1	0
						44
